# Supplementary material for: Associations of Ambient Particulate Matter with Maternal Thyroid Autoimmunity and Thyroid Function in Early Pregnancy
Source: PubMed Central journal article supplement — Environ Sci Technol. 2024 May 14;58(21):9082–90. doi: 10.1021/acs.est.3c10191 (PMC11137865; doi:10.1021/acs.est.3c10191), 2024-05-14
Supplement: es3c10191_si_001.pdf [file es3c10191_si_001.pdf]

# Supporting Information

## Associations of Ambient Particulate Matter with Maternal Thyroid Autoimmunity and Thyroid Function in Early Pregnancy

Enjie Zhang<sup>1,†</sup>, Zheng Zhang<sup>1,†</sup>, Gongbo Chen<sup>2,†</sup>, Yun-Ting Zhang<sup>3,†</sup>, Shaofei Su<sup>1</sup>, Shen Gao<sup>1</sup>, Shuanghua Xie<sup>1</sup>, Jianhui Liu<sup>1</sup>, Yue Zhang<sup>4</sup>, Wentao Yue<sup>4</sup>, Qingqing Wu<sup>5</sup>, Yi Chen<sup>6</sup>, Bo-Yi Yang<sup>3</sup>, Yuming Guo<sup>7</sup>, Ruixia Liu<sup>1,\*</sup>, Guang-Hui Dong<sup>3,\*</sup>, Chenghong Yin<sup>1,\*</sup>

<sup>1</sup> Department of Central Laboratory, Beijing Obstetrics and Gynecology Hospital, Capital Medical University. Beijing Maternal and Child Health Care Hospital. Beijing 100026, China.

<sup>2</sup> Climate, Air Quality Research Unit, School of Public Health and Preventive Medicine, Monash University. Melbourne, VIC 3004, Australia.

<sup>3</sup> Guangdong Provincial Engineering Technology Research Center of Environmental and Health risk Assessment, Department of Occupational and Environmental Health, School of Public Health, Sun Yat-sen University. Guangzhou 510080, China.

<sup>4</sup> Department of Research Management, Beijing Obstetrics and Gynecology Hospital, Capital Medical University. Beijing Maternal and Child Health Care Hospital. Beijing 100026, China.

<sup>5</sup> Department of Ultrasound, Beijing Obstetrics and Gynecology Hospital, Capital Medical University. Beijing Maternal and Child Health Care Hospital. Beijing 100026, China.

<sup>6</sup> Department of Obstetrics, Beijing Obstetrics and Gynecology Hospital, Capital Medical University. Beijing Maternal and Child Health Care Hospital. Beijing 100026, China.

<sup>7</sup> Department of Epidemiology and Preventive Medicine, School of Public Health and Preventive Medicine, Monash University. Melbourne, VIC 3004, Australia.

<sup>†</sup>These authors contributed equally to this work and share first authorship.

### **This file includes:**

Number of pages: 21

Number of Tables: 14 (Page S3-S18)

Number of Figures: 4 (Page S19-S20)

37  
38  
39  
40  
41  
42  
43  
44  
45  
46  
47  
48  
49  
50  
51  
52  
53  
54  
55  
56  
57  
58  
59  
60  
61  
62  
63  
64

## Contents of Tables and Figures

|                                                                                                                                                                                                      |     |
|------------------------------------------------------------------------------------------------------------------------------------------------------------------------------------------------------|-----|
| Table S1. Previous studies of associations of PM with thyroid autoimmunity or thyroid function biomarkers during pregnancy.....                                                                      | S3  |
| Table S2. Comparison of characteristics among pregnant women who included and excluded in this study .....                                                                                           | S5  |
| Table S3. Likelihood ratio test between nonlinear model and linear model .....                                                                                                                       | S7  |
| Table S4. Adjusted associations between PM <sub>1</sub> , PM <sub>1-2.5</sub> , PM <sub>2.5</sub> and thyroid autoimmunity with TPOAb positive, stratified by potential modifiers .....              | S8  |
| Table S5. Estimated changes and 95% CIs of thyroid function biomarkers at 50th, 75th, and 95th percentiles of PM exposure against the minimal percentile of PM in natural cubic splines .....        | S9  |
| Table S6. Association between PM <sub>1</sub> exposure and FT4, stratified by potential modifiers.....                                                                                               | S10 |
| Table S7. Association between PM <sub>1-2.5</sub> exposure and FT4, stratified by potential modifiers .....                                                                                          | S11 |
| Table S8. Association between PM <sub>2.5</sub> exposure and FT4, stratified by potential modifiers.....                                                                                             | S12 |
| Table S9. Association between PM <sub>1</sub> exposure and TSH, stratified by potential modifiers .....                                                                                              | S13 |
| Table S10. Association between PM <sub>1-2.5</sub> exposure and TSH, stratified by potential modifiers                                                                                               | S14 |
| Table S11. Association between PM <sub>2.5</sub> and TSH, stratified by potential modifiers .....                                                                                                    | S15 |
| Table S12. The interaction between PM <sub>1</sub> and PM <sub>1-2.5</sub> in TPOAb positive .....                                                                                                   | S16 |
| Table S13. The interaction between PM <sub>1</sub> and PM <sub>1-2.5</sub> in maternal FT4.....                                                                                                      | S17 |
| Table S14. The interaction between PM <sub>1</sub> and PM <sub>1-2.5</sub> in maternal TSH.....                                                                                                      | S18 |
| Figure S1. Location of study populations and PM <sub>1</sub> concentrations, 2018-2020 .....                                                                                                         | S19 |
| Figure S2. Location of study populations and PM <sub>2.5</sub> concentrations, 2018-2020 .....                                                                                                       | S19 |
| Figure S3. Directed acyclic graph (DAG) for the association between PM exposure and thyroid autoimmunity during pregnancy using DAGitty ( <a href="http://dagitty.net">http://dagitty.net</a> )..... | S20 |
| Figure S4. Flowchart of study enrolment, with the participants selected from Beijing Obstetrics and Gynecology Hospital during February 2018 and February 2020 (n = 15,664) .....                    | S20 |
| References.....                                                                                                                                                                                      | S21 |

65 Table S1. Previous studies of associations of PM with thyroid autoimmunity or thyroid function biomarkers during pregnancy.

| author, year                         | study design    | study population                          | sample size | ambient particulate matters                                                                                                                     | thyroid hormones                        | main findings                                                                                                                                                                                                                                                                                                                                                                                                          |
|--------------------------------------|-----------------|-------------------------------------------|-------------|-------------------------------------------------------------------------------------------------------------------------------------------------|-----------------------------------------|------------------------------------------------------------------------------------------------------------------------------------------------------------------------------------------------------------------------------------------------------------------------------------------------------------------------------------------------------------------------------------------------------------------------|
| Janssen et al., 2017 <sup>1</sup>    | Cohort          | Belgium                                   | 431         | PM <sub>2.5</sub>                                                                                                                               | FT3; FT4; TSH; FT4/FT3                  | Third-trimester PM <sub>2.5</sub> exposure was inversely but not significantly associated with maternal blood FT4 levels collected 1 day after delivery.<br>FT4 levels were significantly inversely associated with PM <sub>2.5</sub> exposure; PM <sub>2.5</sub> associated with elevated odds of hypothyroxinemia. The associations of air pollution exposure with FT4 levels were stronger in TPOAb positive women. |
| Zhao et al., 2019 <sup>2</sup>       | Cohort          | China                                     | 8077        | PM <sub>2.5</sub>                                                                                                                               | FT4; TSH; TPOAb; hypothyroxinemia       | Higher exposure to PM <sub>2.5</sub> was associated with higher odds of hypothyroxinemia; PM <sub>2.5</sub> was significantly associated with thyroid autoimmunity only in one of the four cohorts                                                                                                                                                                                                                     |
| Ghassabian et al., 2019 <sup>3</sup> | Cohort          | Netherlands<br>Spain<br>Greece<br>America | 9931        | PM <sub>2.5</sub> , PM <sub>2.5-10</sub> ,<br>PM <sub>10</sub>                                                                                  | Hypothyroxinemia;<br>high TSH;<br>TPOAb | Maternal exposure to PM <sub>2.5</sub> in the first trimester inversely associated with FT4 but positively associated with TPOAb levels in the second trimester.                                                                                                                                                                                                                                                       |
| Wang et al., 2019 <sup>4</sup>       | Cohort          | China                                     | 433         | PM <sub>2.5</sub> , OM, BC,<br>SO <sub>4</sub> <sup>2-</sup> , NO <sub>3</sub> <sup>-</sup> , and<br>NH <sub>4</sub> <sup>+</sup> and soil dust | FT4; TSH; TPOAb                         | A dose-response relationship between PM <sub>2.5</sub> and TSH was shown.                                                                                                                                                                                                                                                                                                                                              |
| Ilias et al., 2020 <sup>5</sup>      | Case only study | Greece                                    | 293         | PM <sub>2.5</sub> , PM <sub>10</sub>                                                                                                            | TSH                                     |                                                                                                                                                                                                                                                                                                                                                                                                                        |

|                                 |        |       |      |                                                          |                               |                                                                                                                                                                                                               |
|---------------------------------|--------|-------|------|----------------------------------------------------------|-------------------------------|---------------------------------------------------------------------------------------------------------------------------------------------------------------------------------------------------------------|
| Li et al., 2021 <sup>6</sup>    | Cohort | China | 551  | PM <sub>2.5</sub>                                        | FT3; FT4; TSH;<br>FT4/FT3     | PM <sub>2.5</sub> exposure during preconception and the first trimester was significantly associated with decreased maternal FT4 level.                                                                       |
| Zhang et al., 2022 <sup>7</sup> | Cohort | China | 921  | PM <sub>2.5</sub> ; PM <sub>10</sub>                     | FT3; FT4; TSH;<br>FT4/FT3     | Higher ambient PM <sub>2.5</sub> , not PM <sub>10</sub> , exposed during the first trimester of pregnancy were associated with a significant decrease in maternal serum FT4 concentrations and FT4/FT3 ratio. |
| Qiu et al., 2022 <sup>8</sup>   | Cohort | China | 2528 | PM <sub>2.5</sub> and its bound metals, PM <sub>10</sub> | FT3; FT4; TSH;<br>TPOAb; TgAb | PM <sub>2.5</sub> and PM <sub>10</sub> were associated with decreased FT3 and FT4 concentrations, and TPOAb or TgAb status had no effect modification on the observed associations.                           |
| Zhou et al., 2022 <sup>9</sup>  | Cohort | China | 1060 | PM <sub>2.5</sub> and its constituents                   | FT3; FT4; TSH;<br>FT4/FT3     | Early pregnancy PM <sub>2.5</sub> exposure was positively associated with maternal TSH but negatively associated with FT4 and the FT4/FT3 ratio.                                                              |

66 PM: particulate matter; FT4, free thyroxine; FT3, free triiodothyronine; TSH, thyroid-stimulating hormone; OM, organic matter; BC, organic matter; SO<sub>4</sub><sup>2-</sup>, sulfate; NO<sub>3</sub><sup>-</sup>,  
67 nitrate; NH<sub>4</sub><sup>+</sup>, ammonium; TPOAb, thyroid peroxidase antibodies; and TgAb, thyroglobulin antibody.

68 Table S2. Comparison of characteristics among pregnant women who included and excluded in this study.

| variables                                      | all participants<br>(n = 20,008) | participants included<br>(n = 15,664) | participants excluded<br>(n = 4344) | <i>P</i> value |
|------------------------------------------------|----------------------------------|---------------------------------------|-------------------------------------|----------------|
| age, mean (SD), years                          | 31.81 (3.85)                     | 31.78 (3.82)                          | 31.93 (4.05)                        | 0.315          |
| prepregnancy BMI, mean (SD), kg/m <sup>2</sup> | 21.83 (3.27)                     | 21.72 (3.17)                          | 22.01 (3.57)                        | 0.061          |
| annual household income, n (%)                 |                                  |                                       |                                     | 0.439          |
| < 200,000 CNY                                  | 7334 (36.7)                      | 5683 (36.3)                           | 1651 (38.0)                         |                |
| ≥ 200,000 CNY                                  | 12,674 (63.3)                    | 9981 (63.7)                           | 2693 (62.0)                         |                |
| ethnicity, n (%)                               |                                  |                                       |                                     | 0.762          |
| Han                                            | 18,411 (92.0)                    | 14,449 (92.2)                         | 3962 (91.2)                         |                |
| Minority                                       | 1597 (8.0)                       | 1215 (7.8)                            | 382 (8.8)                           |                |
| educational levels, n (%)                      |                                  |                                       |                                     | 0.884          |
| < 16 years                                     | 4408 (22.0)                      | 3448 (22.0)                           | 960 (22.1)                          |                |
| ≥ 16 years                                     | 15,600 (78.0)                    | 12,216 (78.0)                         | 3384 (77.9)                         |                |
| smoking status, n (%)                          |                                  |                                       |                                     | 0.635          |
| Yes                                            | 661 (3.3)                        | 492 (3.1)                             | 169 (3.9)                           |                |
| No                                             | 19,347 (96.7)                    | 15,172 (96.9)                         | 4175 (96.1)                         |                |
| alcohol consumption, n (%)                     |                                  |                                       |                                     | 0.578          |
| Yes                                            | 898 (4.5)                        | 720 (4.6)                             | 178 (4.1)                           |                |
| No                                             | 19,110 (95.5)                    | 14,944 (95.4)                         | 4166 (95.9)                         |                |
| gravidity, n (%)                               |                                  |                                       |                                     | 0.627          |
| 1                                              | 10,673 (53.3)                    | 8375 (53.5)                           | 2298 (52.9)                         |                |
| ≥2                                             | 9335 (46.7)                      | 7289 (46.5)                           | 2046 (47.1)                         |                |
| season of enrollment, n (%)                    |                                  |                                       |                                     | < 0.001        |
| spring                                         | 5084 (25.4)                      | 4024 (25.7)                           | 1060 (24.4)                         |                |

|                                                          |                      |                      |                                   |       |
|----------------------------------------------------------|----------------------|----------------------|-----------------------------------|-------|
| summer                                                   | 4551 (22.7)          | 3582 (22.8)          | 969 (22.3)                        |       |
| autumn                                                   | 5017 (25.1)          | 3883 (24.8)          | 1134 (26.1)                       |       |
| winter                                                   | 5356 (26.8)          | 4175 (26.7)          | 1181 (27.2)                       |       |
| PM <sub>1</sub> , median (Quartile), µg/m <sup>3</sup>   | 33.90 (27.28, 38.84) | 33.83 (27.14, 38.55) | 33.99 (26.64, 39.30) <sup>1</sup> | 0.514 |
| PM <sub>2.5</sub> , median (Quartile), µg/m <sup>3</sup> | 45.07 (36.23, 53.17) | 45.04 (36.12, 52.75) | 45.21 (35.86, 53.41) <sup>1</sup> | 0.857 |

69 <sup>1</sup>Due to 772 participants missing residential address, only 3572 participants included in the analyses. SD, standard difference; BMI, body mass index; CNY, Chinese  
70 yuan. PM<sub>1</sub>, particulate matter with an aerodynamic diameter less than or equal to 1 µm; and PM<sub>2.5</sub>, particulate matter with an aerodynamic diameter less than or  
71 equal to 2.5 µm.

72 Table S3. Likelihood ratio test between nonlinear model and linear model.

| outcome variables | air pollutants      | AIC of<br>nonlinear model | AIC of<br>linear model | <i>P</i> value |
|-------------------|---------------------|---------------------------|------------------------|----------------|
| TPOAb positive    | PM <sub>1</sub>     | 11008.80                  | 11005.60               | 0.461          |
| TPOAb positive    | PM <sub>1-2.5</sub> | 11008.56                  | 11005.13               | 0.335          |
| TPOAb positive    | PM <sub>2.5</sub>   | 11009.77                  | 11005.37               | 0.206          |
| FT4               | PM <sub>1</sub>     | 64059.25                  | 64081.71               | 0.000          |
| FT4               | PM <sub>1-2.5</sub> | 64061.27                  | 64112.96               | 0.000          |
| FT4               | PM <sub>2.5</sub>   | 64062.91                  | 64137.37               | 0.000          |
| TSH               | PM <sub>1</sub>     | 48821.32                  | 48825.09               | 0.022          |
| TSH               | PM <sub>1-2.5</sub> | 48822.54                  | 48825.35               | 0.028          |
| TSH               | PM <sub>2.5</sub>   | 48822.77                  | 48825.87               | 0.029          |

73 Both nonlinear model and linear model were adjusted for maternal age, prepregnancy BMI, annual  
74 household income, ethnicity, educational levels, smoking status, alcohol consumption, gravidity,  
75 seasons of enrollment, and gestational week. AIC, Akaike information criterion; TPOAb, thyroid  
76 peroxidase antibodies; FT4, free thyroxine; TSH, thyroid-stimulating hormone; PM<sub>1</sub>, particulate  
77 matter with an aerodynamic diameter less than or equal to 1  $\mu\text{m}$ ; PM<sub>1-2.5</sub>, particulate matter with  
78 an aerodynamic diameter between 1 and 2.5  $\mu\text{m}$ ; and PM<sub>2.5</sub>, particulate matter with an  
79 aerodynamic diameter less than or equal to 2.5  $\mu\text{m}$ .

80 Table S4. Adjusted associations between PM<sub>1</sub>, PM<sub>1-2.5</sub>, PM<sub>2.5</sub> and thyroid autoimmunity with TPOAb positive, stratified by potential modifiers.

| variables               | PM <sub>1</sub>   |                                 | PM <sub>1-2.5</sub> |                                 | PM <sub>2.5</sub> |                                 |
|-------------------------|-------------------|---------------------------------|---------------------|---------------------------------|-------------------|---------------------------------|
|                         | OR (95% CI)       | <i>P</i> <sub>interaction</sub> | OR (95% CI)         | <i>P</i> <sub>interaction</sub> | OR (95% CI)       | <i>P</i> <sub>interaction</sub> |
| maternal age            |                   | 0.874                           |                     | 0.781                           |                   | 0.575                           |
| ≥ 35 years              | 1.06 (0.82, 1.29) |                                 | 1.15 (1.05, 1.25)   |                                 | 1.07 (0.90, 1.24) |                                 |
| < 35 years              | 1.05 (0.98, 1.13) |                                 | 1.15 (1.09, 1.21)   |                                 | 1.06 (1.01, 1.12) |                                 |
| prepregnancy BMI        |                   | 0.744                           |                     | 0.581                           |                   | 0.639                           |
| ≥ 25 kg/m <sup>2</sup>  | 1.07 (0.86, 1.24) |                                 | 1.17 (0.94, 1.38)   |                                 | 1.10 (0.87, 1.33) |                                 |
| < 25 kg/m <sup>2</sup>  | 1.04 (0.96, 1.12) |                                 | 1.13 (1.07, 1.19)   |                                 | 1.05 (1.00, 1.10) |                                 |
| education level, years  |                   | 0.549                           |                     | 0.668                           |                   | 0.894                           |
| < 16 years              | 1.06 (0.85, 1.27) |                                 | 1.16 (1.01, 1.31)   |                                 | 1.07 (0.88, 1.26) |                                 |
| ≥ 16 years              | 1.02 (0.92, 1.13) |                                 | 1.13 (0.99, 1.27)   |                                 | 1.05 (0.97, 1.13) |                                 |
| annual household income |                   | 0.087                           |                     | < 0.001                         |                   | 0.008                           |
| < 200,000 CNY           | 1.07 (0.90, 1.24) |                                 | 1.21 (1.09, 1.33)   |                                 | 1.09 (1.03, 1.17) |                                 |
| ≥ 200,000 CNY           | 1.01 (0.92, 1.11) |                                 | 1.12 (1.01, 1.23)   |                                 | 1.00 (0.91, 1.09) |                                 |
| gravity                 |                   | 0.119                           |                     | 0.768                           |                   | 0.855                           |
| 1                       | 1.07 (0.95, 1.18) |                                 | 1.18 (1.05, 1.31)   |                                 | 1.06 (0.99, 1.12) |                                 |
| ≥2                      | 0.99 (0.87, 1.09) |                                 | 1.14 (1.01, 1.27)   |                                 | 1.05 (0.98, 1.12) |                                 |

81 All models were adjusted for the maternal age, prepregnancy BMI, annual household income, ethnicity, educational levels, smoking status, alcohol consumption,  
 82 gravity, seasons of enrollment, and gestational week, unless the one used as a modifier. PM<sub>1</sub>, particulate matter with an aerodynamic diameter less than or equal  
 83 to 1 μm; PM<sub>1-2.5</sub>, particulate matter with an aerodynamic diameter between 1 and 2.5 μm; PM<sub>2.5</sub>, particulate matter with an aerodynamic diameter less than or  
 84 equal to 2.5 μm; BMI, body mass index; and CNY, Chinese Yuan.



85 Table S5. Estimated changes and 95% CIs of thyroid function biomarkers at 50th, 75th, and 95th  
 86 percentiles of PM exposure against the minimal percentile of PM in natural cubic splines.

|                     | Min <sup>1</sup> | 50 <sup>th, 2</sup>  | 75 <sup>th, 3</sup>  | 95 <sup>th, 4</sup>  |
|---------------------|------------------|----------------------|----------------------|----------------------|
| FT4 (pmol/L)        |                  |                      |                      |                      |
| PM <sub>1</sub>     | Ref              | -0.42 (-0.79, 0.04)  | -0.57 (-0.97, -0.18) | -0.90 (-1.29, -0.51) |
| PM <sub>1-2.5</sub> | Ref              | -1.31 (-1.69, -0.98) | -0.95 (-1.29, -0.61) | -0.73 (-1.09, -0.37) |
| PM <sub>2.5</sub>   | Ref              | -0.77 (-1.05, -0.49) | -0.76 (-1.05, -0.48) | -0.86 (-1.15, -0.57) |
| TSH (mIU/L)         |                  |                      |                      |                      |
| PM <sub>1</sub>     | Ref              | 0.22 (-0.01, 0.45)   | 0.17 (-0.07, 0.41)   | 0.20 (-0.04, 0.44)   |
| PM <sub>1-2.5</sub> | Ref              | 0.13 (-0.06, 0.32)   | 0.16 (-0.04, 0.36)   | 0.15 (-0.02, 0.32)   |
| PM <sub>2.5</sub>   | Ref              | 0.26 (0.09, 0.43)    | 0.30 (0.13, 0.48)    | 0.30 (0.12, 0.48)    |

87 All models were adjusted for the maternal age, prepregnancy BMI, annual household income,  
 88 ethnicity, educational levels, smoking status, alcohol consumption, gravidity, seasons of enrollment,  
 89 and weeks of gestation. PM<sub>1</sub>, particulate matter with an aerodynamic diameter less than or equal  
 90 to 1 µm; PM<sub>1-2.5</sub>, particulate matter with an aerodynamic diameter between 1 and 2.5 µm; PM<sub>2.5</sub>,  
 91 particulate matter with an aerodynamic diameter less than or equal to 2.5 µm; Min, minimum;  
 92 Ref, reference; FT4, free thyroxine; and TSH, thyroid-stimulating hormone.

93 <sup>1</sup> The minimum of PM<sub>1</sub>, PM<sub>1-2.5</sub> and PM<sub>2.5</sub> are 6.92 µg/m<sup>3</sup>, 0.02 µg/m<sup>3</sup> and 9.64 µg/m<sup>3</sup> respectively.

94 <sup>2</sup> The 50<sup>th</sup> percentile of PM<sub>1</sub>, PM<sub>1-2.5</sub> and PM<sub>2.5</sub> are 33.83 µg/m<sup>3</sup>, 13.26 µg/m<sup>3</sup> and 45.04 µg/m<sup>3</sup>  
 95 respectively.

96 <sup>3</sup> The 75<sup>th</sup> percentile of PM<sub>1</sub>, PM<sub>1-2.5</sub> and PM<sub>2.5</sub> are 38.55 µg/m<sup>3</sup>, 19.23 µg/m<sup>3</sup> and 52.75 µg/m<sup>3</sup>  
 97 respectively.

98 <sup>4</sup> The 95<sup>th</sup> percentile of PM<sub>1</sub>, PM<sub>1-2.5</sub> and PM<sub>2.5</sub> are 42.53 µg/m<sup>3</sup>, 23.46 µg/m<sup>3</sup> and 58.31 µg/m<sup>3</sup>  
 99 respectively.

100 Table S6. Association between PM<sub>1</sub> exposure and FT4, stratified by potential modifiers.

| air pollution               | 50 <sup>th</sup>     |                   | 75 <sup>th</sup>     |                   | 95 <sup>th</sup>     |                   |
|-----------------------------|----------------------|-------------------|----------------------|-------------------|----------------------|-------------------|
|                             | $\beta$ (95% CI)     | $P_{interaction}$ | $\beta$ (95% CI)     | $P_{interaction}$ | $\beta$ (95% CI)     | $P_{interaction}$ |
| age                         |                      | 0.405             |                      | 0.453             |                      | 0.510             |
| $\geq 35$ years             | -0.09 (-0.96, 0.78)  |                   | -0.26 (-1.18, 0.66)  |                   | -0.63 (-1.53, 0.28)  |                   |
| $< 35$ years                | -0.50 (-0.91, -0.08) |                   | -0.65 (-1.08, -0.22) |                   | -0.96 (-1.39, -0.54) |                   |
| prepregnancy BMI            |                      | 0.453             |                      | 0.467             |                      | 0.365             |
| $\geq 25$ kg/m <sup>2</sup> | -0.77 (-1.74, 0.19)  |                   | -0.93 (-1.94, 0.07)  |                   | -1.35 (-2.35, -0.35) |                   |
| $< 25$ kg/m <sup>2</sup>    | -0.37 (-0.78, 0.03)  |                   | -0.53 (-0.95, -0.10) |                   | -0.85 (-1.27, -0.43) |                   |
| education level             |                      | 0.950             |                      | 0.897             |                      | 0.715             |
| $< 16$ years                | -0.42 (-0.83, 0.00)  |                   | -0.58 (-1.02, -0.14) |                   | -0.94 (-1.37, -0.50) |                   |
| $\geq 16$ years             | -0.39 (-1.22, 0.45)  |                   | -0.51 (-1.38, 0.35)  |                   | -0.76 (-1.62, 0.11)  |                   |
| annual household income     |                      | 0.022             |                      | 0.011             |                      | 0.029             |
| $< 200,000$ CNY             | -1.05 (-1.71, -0.39) |                   | -1.29 (-1.98, -0.61) |                   | -1.53 (-2.22, -0.85) |                   |
| $\geq 200,000$ CNY          | -0.11 (-0.56, 0.33)  |                   | -0.22 (-0.69, 0.25)  |                   | -0.61 (-1.08, -0.14) |                   |
| gravidity                   |                      | 0.722             |                      | 0.838             |                      | 0.995             |
| 1                           | -0.35 (-0.88, 0.19)  |                   | -0.52 (-1.09, 0.04)  |                   | -0.90 (-1.45, -0.34) |                   |
| $\geq 2$                    | -0.48 (-1.00, 0.03)  |                   | -0.60 (-1.14, -0.07) |                   | -0.90 (-1.44, -0.36) |                   |
| TPOAb status                |                      | 0.699             |                      | 0.763             |                      | 0.775             |
| negative                    | -0.56 (-0.98, -0.13) |                   | -0.88 (-1.30, -0.47) |                   | -0.87 (-1.38, -0.36) |                   |
| positive                    | -0.73 (-1.76, 0.31)  |                   | -1.05 (-2.07, -0.02) |                   | -1.16 (-1.89, -0.43) |                   |

101 The model was adjusted for the maternal age, prepregnancy BMI, annual household income, ethnicity, educational levels, smoking status, alcohol consumption,  
 102 gravidity, seasons of enrollment, and weeks of gestation, unless the one used as a modifier. PM<sub>1</sub>, particulate matter with an aerodynamic diameter less than or equal  
 103 to 1  $\mu\text{m}$ ; BMI, body mass index; CNY, Chinese Yuan; and TPOAb, thyroid peroxidase antibodies. The reference of PM<sub>1</sub> exposure is 6.92  $\mu\text{g}/\text{m}^3$ . The 50<sup>th</sup>, 75<sup>th</sup> and 95<sup>th</sup>  
 104 percentile of PM<sub>1</sub> exposure is 33.83  $\mu\text{g}/\text{m}^3$ , 38.55  $\mu\text{g}/\text{m}^3$  and 42.53  $\mu\text{g}/\text{m}^3$ .

105 Table S7. Association between PM<sub>1-2.5</sub> exposure and FT4, stratified by potential modifiers.

| air pollution           | 50 <sup>th</sup>     |                                 | 75 <sup>th</sup>     |                                 | 95 <sup>th</sup>     |                                 |
|-------------------------|----------------------|---------------------------------|----------------------|---------------------------------|----------------------|---------------------------------|
|                         | β(95% CI)            | <i>P</i> <sub>interaction</sub> | β(95% CI)            | <i>P</i> <sub>interaction</sub> | β(95% CI)            | <i>P</i> <sub>interaction</sub> |
| age                     |                      | 0.897                           |                      | 0.472                           |                      | 0.309                           |
| ≥ 35 years              | -1.30 (-1.93, -0.67) |                                 | -0.98 (-1.68, -0.28) |                                 | -0.65 (-1.37, 0.07)  |                                 |
| < 35 years              | -1.32 (-2.01, -0.63) |                                 | -0.90 (-1.60, -0.21) |                                 | -0.79 (-1.51, -0.06) |                                 |
| prepregnancy BMI        |                      | 0.573                           |                      | 0.359                           |                      | 0.792                           |
| ≥ 25 kg/m <sup>2</sup>  | -1.33 (-2.05, -0.61) |                                 | -0.61 (-1.41, 0.19)  |                                 | -0.71 (-1.42, 0.01)  |                                 |
| < 25 kg/m <sup>2</sup>  | -1.28 (-2.03, -0.53) |                                 | -0.79 (-1.10, -0.49) |                                 | -0.76 (-1.47, -0.05) |                                 |
| education level         |                      | 0.398                           |                      | 0.426                           |                      | 0.501                           |
| < 16 years              | -1.32 (-1.91, -0.73) |                                 | -1.03 (-1.72, -0.34) |                                 | -0.77 (-1.47, -0.07) |                                 |
| ≥ 16 years              | -0.99 (-1.85, -0.13) |                                 | -0.92 (-1.60, -0.24) |                                 | -0.63 (-1.33, 0.07)  |                                 |
| annual household income |                      | < 0.001                         |                      | < 0.001                         |                      | < 0.001                         |
| < 200,000 CNY           | -1.46 (-2.18, -0.74) |                                 | -1.11 (-1.76, -0.46) |                                 | -1.04 (-1.74, -0.37) |                                 |
| ≥ 200,000 CNY           | -0.95 (-1.69, -0.21) |                                 | -0.77 (-1.47, -0.07) |                                 | -0.55 (-1.26, -0.16) |                                 |
| gravidity               |                      | 0.591                           |                      | 0.678                           |                      | 0.826                           |
| 1                       | -1.37 (-2.07, -0.67) |                                 | -0.96 (-1.65, -0.27) |                                 | -0.73 (-1.45, -0.01) |                                 |
| ≥2                      | -1.25 (-1.95, -0.55) |                                 | -0.92 (-1.61, -0.23) |                                 | -0.75 (-1.56, 0.06)  |                                 |
| TPOAb status            |                      | 0.322                           |                      | 0.514                           |                      | 0.317                           |
| negative                | -1.24 (-1.96, -0.52) |                                 | -0.86 (-1.56, -0.16) |                                 | -0.69 (-1.39, 0.01)  |                                 |
| positive                | -1.41 (-2.13, -0.69) |                                 | -1.03 (-1.73, -0.33) |                                 | -0.81 (-1.51, -0.11) |                                 |

106 The model was adjusted for the maternal age, prepregnancy BMI, annual household income, ethnicity, educational levels, smoking status, alcohol consumption,  
 107 gravidity, seasons of enrollment, and weeks of gestation, unless the one used as a modifier. PM<sub>1-2.5</sub>, particulate matter with an aerodynamic diameter between 1 and  
 108 2.5 μm; BMI, body mass index; CNY, Chinese Yuan; and TPOAb, thyroid peroxidase antibodies. The reference of PM<sub>1-2.5</sub> exposure is 0.02 μg/m<sup>3</sup>. The 50<sup>th</sup>, 75<sup>th</sup> and  
 109 95<sup>th</sup> percentile of PM<sub>1-2.5</sub> exposure is 13.26 μg/m<sup>3</sup>, 19.23 μg/m<sup>3</sup> and 23.46 μg/m<sup>3</sup>.

110 Table S8. Association between PM<sub>2.5</sub> exposure and FT4, stratified by potential modifiers.

| air pollution               | 50 <sup>th</sup>     |                          | 75 <sup>th</sup>     |                          | 95 <sup>th</sup>     |                          |
|-----------------------------|----------------------|--------------------------|----------------------|--------------------------|----------------------|--------------------------|
|                             | $\beta$ (95% CI)     | $P_{\text{interaction}}$ | $\beta$ (95% CI)     | $P_{\text{interaction}}$ | $\beta$ (95% CI)     | $P_{\text{interaction}}$ |
| age                         |                      | 0.979                    |                      | 0.841                    |                      | 0.974                    |
| $\geq 35$ years             | -0.76 (-1.41, -0.11) |                          | -0.70 (-1.38, -0.03) |                          | -0.86 (-1.54, -0.17) |                          |
| $< 35$ years                | -0.77 (-1.08, -0.46) |                          | -0.78 (-1.10, -0.46) |                          | -0.87 (-1.19, -0.55) |                          |
| prepregnancy BMI            |                      | 0.952                    |                      | 0.672                    |                      | 0.862                    |
| $\geq 25$ kg/m <sup>2</sup> | -0.80 (-1.57, -0.03) |                          | -0.61 (-1.41, 0.19)  |                          | -0.81 (-1.61, -0.01) |                          |
| $< 25$ kg/m <sup>2</sup>    | -0.78 (-1.07, -0.48) |                          | -0.79 (-1.10, -0.49) |                          | -0.89 (-1.20, -0.57) |                          |
| education level             |                      | 0.786                    |                      | 0.796                    |                      | 0.449                    |
| $< 16$ years                | -0.78 (-1.10, -0.46) |                          | -0.75 (-1.09, -0.42) |                          | -0.92 (-1.26, -0.59) |                          |
| $\geq 16$ years             | -0.69 (-1.25, -0.14) |                          | -0.67 (-1.23, -0.10) |                          | -0.67 (-1.24, -0.09) |                          |
| annual household income     |                      | 0.037                    |                      | 0.023                    |                      | 0.052                    |
| $< 200,000$ CNY             | -1.18 (-1.66, -0.69) |                          | -1.19 (-1.68, -0.70) |                          | -1.27 (-1.78, -0.77) |                          |
| $\geq 200,000$ CNY          | -0.55 (-0.89, -0.21) |                          | -0.49 (-0.85, -0.14) |                          | -0.66 (-1.02, -0.31) |                          |
| gravidity                   |                      | 0.844                    |                      | 0.574                    |                      | 0.905                    |
| 1                           | -0.74 (-1.13, -0.34) |                          | -0.65 (-1.06, -0.24) |                          | -0.89 (-1.30, -0.47) |                          |
| $\geq 2$                    | -0.79 (-1.19, -0.40) |                          | -0.82 (-1.22, -0.41) |                          | -0.85 (-1.26, -0.44) |                          |
| TPOAb status                |                      | 0.552                    |                      | 0.634                    |                      | 0.424                    |
| negative                    | -0.74 (-1.04, -0.43) |                          | -0.82 (-1.14, -0.51) |                          | -0.74 (-1.04, -0.44) |                          |
| positive                    | -0.94 (-1.73, -0.16) |                          | -1.17 (-1.96, -0.38) |                          | -0.98 (-1.73, -0.23) |                          |

111 The model was adjusted for the maternal age, prepregnancy BMI, annual household income, ethnicity, educational levels, smoking status, alcohol consumption,  
 112 gravidity, seasons of enrollment, and weeks of gestation, unless the one used as a modifier. PM<sub>2.5</sub>, particulate matter with an aerodynamic diameter less than or equal  
 113 to 2.5  $\mu\text{m}$ ; BMI, body mass index; CNY, Chinese Yuan; and TPOAb, thyroid peroxidase antibodies. The reference of PM<sub>2.5</sub> exposure is 9.64  $\mu\text{g}/\text{m}^3$ . The 50<sup>th</sup>, 75<sup>th</sup> and  
 114 95<sup>th</sup> percentile of PM<sub>2.5</sub> exposure is 45.04  $\mu\text{g}/\text{m}^3$ , 52.75  $\mu\text{g}/\text{m}^3$  and 58.31  $\mu\text{g}/\text{m}^3$ .

115 Table S9. Association between PM<sub>1</sub> exposure and TSH, stratified by potential modifiers.

| air pollution               | 50 <sup>th</sup>    |                          | 75 <sup>th</sup>    |                          | 95 <sup>th</sup>    |                          |
|-----------------------------|---------------------|--------------------------|---------------------|--------------------------|---------------------|--------------------------|
|                             | $\beta$ (95% CI)    | $P_{\text{interaction}}$ | $\beta$ (95% CI)    | $P_{\text{interaction}}$ | $\beta$ (95% CI)    | $P_{\text{interaction}}$ |
| age                         |                     | 0.815                    |                     | 0.939                    |                     | 0.878                    |
| $\geq 35$ years             | 0.15 (-0.41, 0.70)  |                          | 0.15 (-0.39, 0.70)  |                          | 0.16 (-0.37, 0.68)  |                          |
| $< 35$ years                | 0.17 (-0.10, 0.44)  |                          | 0.20 (-0.07, 0.46)  |                          | 0.23 (-0.03, 0.48)  |                          |
| prepregnancy BMI            |                     | 0.347                    |                     | 0.386                    |                     | 0.393                    |
| $\geq 25$ kg/m <sup>2</sup> | 0.44 (-0.21, 1.10)  |                          | 0.46 (-0.19, 1.12)  |                          | 0.50 (-0.13, 1.13)  |                          |
| $< 25$ kg/m <sup>2</sup>    | 0.13 (-0.13, 0.39)  |                          | 0.16 (-0.10, 0.41)  |                          | 0.18 (-0.07, 0.43)  |                          |
| education level             |                     | 0.972                    |                     | 0.991                    |                     | 0.845                    |
| $< 16$ years                | 0.17 (-0.10, 0.43)  |                          | 0.21 (-0.05, 0.47)  |                          | 0.22 (-0.04, 0.47)  |                          |
| $\geq 16$ years             | 0.16 (-0.41, 0.73)  |                          | 0.15 (-0.42, 0.72)  |                          | 0.23 (-0.32, 0.78)  |                          |
| annual household income     |                     | 0.190                    |                     | 0.146                    |                     | 0.152                    |
| $< 200,000$ CNY             | -0.09 (-0.51, 0.34) |                          | -0.06 (-0.48, 0.37) |                          | -0.00 (-0.42, 0.41) |                          |
| $\geq 200,000$ CNY          | 0.29 (0.01, 0.58)   |                          | 0.32 (0.03, 0.60)   |                          | 0.33 (0.05, 0.60)   |                          |
| gravidity                   |                     | 0.678                    |                     | 0.471                    |                     | 0.531                    |
| 1                           | 0.26 (-0.09, 0.62)  |                          | 0.28 (-0.07, 0.62)  |                          | 0.27 (-0.06, 0.61)  |                          |
| $\geq 2$                    | 0.09 (-0.24, 0.41)  |                          | 0.12 (-0.20, 0.45)  |                          | 0.18 (-0.13, 0.49)  |                          |
| TPOAb status                |                     | 0.283                    |                     | 0.077                    |                     | 0.116                    |
| negative                    | 0.12 (-0.12, 0.36)  |                          | 0.13 (-0.11, 0.36)  |                          | 0.08 (-0.16, 0.32)  |                          |
| positive                    | 0.59 (-0.23, 1.41)  |                          | 0.87 (0.08, 1.65)   |                          | 0.77 (-0.06, 1.60)  |                          |

116 The model was adjusted for the maternal age, prepregnancy BMI, annual household income, ethnicity, educational levels, smoking status, alcohol consumption,  
 117 gravidity, seasons of enrollment, and weeks of gestation, unless the one used as a modifier. PM<sub>1</sub>, particulate matter with an aerodynamic diameter less than or equal  
 118 to 1  $\mu\text{m}$ ; BMI, body mass index; CNY, Chinese Yuan; and TPOAb, thyroid peroxidase antibodies. The reference of PM<sub>1</sub> exposure is 6.92  $\mu\text{g}/\text{m}^3$ . The 50<sup>th</sup>, 75<sup>th</sup> and 95<sup>th</sup>  
 119 percentile of PM<sub>1</sub> exposure is 33.83  $\mu\text{g}/\text{m}^3$ , 38.55  $\mu\text{g}/\text{m}^3$  and 42.53  $\mu\text{g}/\text{m}^3$ .

120 Table S10. Association between PM<sub>1-2.5</sub> and TSH, stratified by potential modifiers.

| air pollution           | 50 <sup>th</sup>   |                                 | 75 <sup>th</sup>   |                                 | 95 <sup>th</sup>   |                                 |
|-------------------------|--------------------|---------------------------------|--------------------|---------------------------------|--------------------|---------------------------------|
|                         | β(95% CI)          | <i>P</i> <sub>interaction</sub> | β(95% CI)          | <i>P</i> <sub>interaction</sub> | β(95% CI)          | <i>P</i> <sub>interaction</sub> |
| age                     |                    | 0.752                           |                    | 0.118                           |                    | 0.418                           |
| ≥ 35 years              | 0.11 (-0.19, 0.41) |                                 | 0.22 (-0.11, 0.55) |                                 | 0.21 (-0.09, 0.54) |                                 |
| < 35 years              | 0.16 (-0.15, 0.47) |                                 | 0.13 (-0.18, 0.44) |                                 | 0.12 (-0.21, 0.45) |                                 |
| prepregnancy BMI        |                    | 0.230                           |                    | 0.185                           |                    | 0.836                           |
| ≥ 25 kg/m <sup>2</sup>  | 0.18 (-0.36, 0.72) |                                 | 0.14 (-0.38, 0.66) |                                 | 0.15 (-0.43, 0.73) |                                 |
| < 25 kg/m <sup>2</sup>  | 0.13 (-0.23, 0.49) |                                 | 0.21 (-0.16, 0.58) |                                 | 0.19 (-0.20, 0.58) |                                 |
| education level         |                    | 0.246                           |                    | 0.665                           |                    | 0.134                           |
| < 16 years              | 0.17 (-0.27, 0.61) |                                 | 0.18 (-0.26, 0.62) |                                 | 0.23 (-0.22, 0.68) |                                 |
| ≥ 16 years              | 0.14 (-0.19, 0.47) |                                 | 0.15 (-0.19, 0.49) |                                 | 0.08 (-0.24, 0.40) |                                 |
| annual household income |                    | 0.879                           |                    | 0.893                           |                    | 0.541                           |
| < 200,000 CNY           | 0.15 (-0.19, 0.49) |                                 | 0.16 (-0.18, 0.51) |                                 | 0.18 (-0.16, 0.52) |                                 |
| ≥ 200,000 CNY           | 0.16 (-0.12, 0.44) |                                 | 0.17 (-0.11, 0.45) |                                 | 0.14 (-0.18, 0.46) |                                 |
| gravidity               |                    | 0.218                           |                    | 0.267                           |                    | 0.166                           |
| 1                       | 0.21 (-0.16, 0.58) |                                 | 0.21 (-0.17, 0.59) |                                 | 0.26 (0.11, 0.60)  |                                 |
| ≥2                      | 0.13 (-0.24, 0.49) |                                 | 0.11(-0.25, 0.47)  |                                 | 0.14 (-0.22, 0.51) |                                 |
| TPOAb status            |                    | 0.173                           |                    | 0.121                           |                    | 0.104                           |
| negative                | 0.03 (-0.49, 0.55) |                                 | 0.09 (-0.45, 0.63) |                                 | 0.08 (-0.47, 0.62) |                                 |
| positive                | 0.27 (-0.71, 1.25) |                                 | 0.38 (-0.59, 1.35) |                                 | 0.63 (-0.34, 1.60) |                                 |

121 The model was adjusted for the maternal age, prepregnancy BMI, annual household income, ethnicity, educational levels, smoking status, alcohol consumption,  
 122 gravidity, seasons of enrollment, and weeks of gestation, unless the one used as a modifier. PM<sub>1-2.5</sub>, particulate matter with an aerodynamic diameter between 1 and 2.5  
 123 μm; BMI, body mass index; CNY, Chinese Yuan; and TPOAb, thyroid peroxidase antibodies. The reference of PM<sub>1-2.5</sub> exposure is 0.02 μg/m<sup>3</sup>. The 50<sup>th</sup>, 75<sup>th</sup> and 95<sup>th</sup>  
 124 percentile of PM<sub>1-2.5</sub> exposure is 13.26 μg/m<sup>3</sup>, 19.23 μg/m<sup>3</sup> and 23.46 μg/m<sup>3</sup>.

125 Table S11. Association between PM<sub>2.5</sub> and TSH, stratified by potential modifiers.

| air pollution               | 50 <sup>th</sup>   |                          | 75 <sup>th</sup>   |                          | 95 <sup>th</sup>   |                          |
|-----------------------------|--------------------|--------------------------|--------------------|--------------------------|--------------------|--------------------------|
|                             | $\beta$ (95% CI)   | $P_{\text{interaction}}$ | $\beta$ (95% CI)   | $P_{\text{interaction}}$ | $\beta$ (95% CI)   | $P_{\text{interaction}}$ |
| age                         |                    | 0.476                    |                    | 0.562                    |                    | 0.545                    |
| $\geq 35$ years             | 0.27 (0.01, 0.60)  |                          | 0.35 (0.08, 0.72)  |                          | 0.35 (0.08, 0.73)  |                          |
| $< 35$ years                | 0.19 (-0.13, 0.52) |                          | 0.25 (-0.03, 0.59) |                          | 0.26 (-0.06, 0.62) |                          |
| prepregnancy BMI            |                    | 0.649                    |                    | 0.805                    |                    | 0.493                    |
| $\geq 25$ kg/m <sup>2</sup> | 0.24 (-0.33, 0.71) |                          | 0.24 (-0.28, 0.77) |                          | 0.10 (-0.40, 0.60) |                          |
| $< 25$ kg/m <sup>2</sup>    | 0.19 (0.14, 0.51)  |                          | 0.31 (0.13, 0.50)  |                          | 0.29 (0.11, 0.47)  |                          |
| education level             |                    | 0.604                    |                    | 0.609                    |                    | 0.692                    |
| $< 16$ years                | 0.28 (0.07, 0.75)  |                          | 0.37 (0.11, 0.75)  |                          | 0.34 (0.09, 0.71)  |                          |
| $\geq 16$ years             | 0.17 (0.01, 0.47)  |                          | 0.28 (0.08, 0.48)  |                          | 0.23 (0.04, 0.43)  |                          |
| annual household income     |                    | 0.934                    |                    | 0.955                    |                    | 0.960                    |
| $< 200,000$ CNY             | 0.27 (-0.00, 0.60) |                          | 0.31 (-0.00, 0.62) |                          | 0.25 (-0.05, 0.55) |                          |
| $\geq 200,000$ CNY          | 0.26 (0.08, 0.51)  |                          | 0.30 (0.08, 0.51)  |                          | 0.26 (0.06, 0.47)  |                          |
| gravidity                   |                    | 0.908                    |                    | 0.961                    |                    | 0.289                    |
| 1                           | 0.28 (0.06, 0.57)  |                          | 0.31 (0.06, 0.58)  |                          | 0.36 (0.11, 0.60)  |                          |
| $\geq 2$                    | 0.24 (0.01, 0.53)  |                          | 0.30 (0.06, 0.56)  |                          | 0.17 (-0.06, 0.41) |                          |
| TPOAb status                |                    | 0.252                    |                    | 0.284                    |                    | 0.335                    |
| negative                    | 0.25 (0.10, 0.41)  |                          | 0.23 (0.05, 0.40)  |                          | 0.28 (0.10, 0.45)  |                          |
| positive                    | 0.60 (0.13, 1.11)  |                          | 0.59 (0.01, 1.19)  |                          | 0.63 (0.01, 1.26)  |                          |

126 The model was adjusted for the maternal age, prepregnancy BMI, annual household income, ethnicity, educational levels, smoking status, alcohol consumption,  
 127 gravidity, seasons of enrollment, and weeks of gestation, unless the one used as a modifier. PM<sub>2.5</sub>, particulate matter with an aerodynamic diameter less than or equal  
 128 to 2.5  $\mu\text{m}$ ; BMI, body mass index; CNY, Chinese Yuan; and TPOAb, thyroid peroxidase antibodies. The reference of PM<sub>2.5</sub> exposure is 9.64  $\mu\text{g}/\text{m}^3$ . The 50<sup>th</sup>, 75<sup>th</sup> and  
 129 95<sup>th</sup> percentile of PM<sub>2.5</sub> exposure is 45.04  $\mu\text{g}/\text{m}^3$ , 52.75  $\mu\text{g}/\text{m}^3$  and 58.31  $\mu\text{g}/\text{m}^3$ .

130 Table S12. The interaction between PM<sub>1</sub> and PM<sub>1-2.5</sub> in TPOAb positive.

|                 | PM <sub>1-2.5</sub> < 50 <sup>th</sup> (n = 7832) | PM <sub>1-2.5</sub> ≥ 50 <sup>th</sup> (n = 7832) | <i>P</i> <sub>interaction</sub> |
|-----------------|---------------------------------------------------|---------------------------------------------------|---------------------------------|
|                 | OR (95%CI)                                        | OR (95%CI)                                        |                                 |
| PM <sub>1</sub> | 1.05 (0.94, 1.16)                                 | 1.06 (0.94, 1.17)                                 | 0.969                           |

131 The model was adjusted for the maternal age, prepregnancy BMI, annual household income,  
 132 ethnicity, educational levels, smoking status, alcohol consumption, gravidity, seasons of enrollment,  
 133 and weeks of gestation. PM<sub>1</sub>, particulate matter with an aerodynamic diameter less than or equal  
 134 to 1 μm; PM<sub>1-2.5</sub>, particulate matter with an aerodynamic diameter between 1 and 2.5 μm; and  
 135 BMI, body mass index. The 50<sup>th</sup> of PM<sub>1-2.5</sub> exposure is 13.26 μg/m<sup>3</sup>.



136 Table S13. The interaction between PM<sub>1</sub> and PM<sub>1-2.5</sub> in maternal FT4.

| PM <sub>1</sub>  | PM <sub>1-2.5</sub> < 50 <sup>th</sup> (n = 7832) | PM <sub>1-2.5</sub> ≥ 50 <sup>th</sup> (n = 7832) | <i>P</i> <sub>interaction</sub> |
|------------------|---------------------------------------------------|---------------------------------------------------|---------------------------------|
|                  | β (95%CI)                                         | β (95%CI)                                         |                                 |
| 50 <sup>th</sup> | -0.36 (-0.92, 0.20)                               | -0.37 (-0.93, 0.19)                               | 0.891                           |
| 75 <sup>th</sup> | -0.76 (-1.98, 0.46)                               | -0.79 (-1.35, -0.23)                              | 0.773                           |
| 95 <sup>th</sup> | -                                                 | -0.81 (-1.36, -0.26)                              | -                               |

137 The model was adjusted for the maternal age, prepregnancy BMI, annual household income,  
 138 ethnicity, educational levels, smoking status, alcohol consumption, gravidity, seasons of enrollment,  
 139 and weeks of gestation. PM<sub>1</sub>, particulate matter with an aerodynamic diameter less than or equal to  
 140 1 μm; PM<sub>1-2.5</sub>, particulate matter with an aerodynamic diameter between 1 and 2.5 μm; and BMI,  
 141 body mass index. The 50<sup>th</sup> of PM<sub>1-2.5</sub> exposure is 13.26 μg/m<sup>3</sup>. The 50<sup>th</sup>, 75<sup>th</sup> and 95<sup>th</sup> percentile of  
 142 PM<sub>1</sub> exposure is 33.83 μg/m<sup>3</sup>, 38.55 μg/m<sup>3</sup> and 42.53 μg/m<sup>3</sup>.

143 Table S14. The interaction between PM<sub>1</sub> and PM<sub>1-2.5</sub> in maternal TSH.

| PM <sub>1</sub>  | PM <sub>1-2.5</sub> < 50 <sup>th</sup> (n = 7832) | PM <sub>1-2.5</sub> ≥ 50 <sup>th</sup> (n = 7832) | <i>P</i> <sub>interaction</sub> |
|------------------|---------------------------------------------------|---------------------------------------------------|---------------------------------|
|                  | β (95%CI)                                         | β (95%CI)                                         |                                 |
| 50 <sup>th</sup> | 0.13 (-0.11, 0.37)                                | 0.13 (-0.13, 0.39)                                | 0.912                           |
| 75 <sup>th</sup> | 0.33 (-1.25, 1.91)                                | 0.35(-0.06, 0.76)                                 | 0.852                           |
| 95 <sup>th</sup> | -                                                 | 0.32 (-0.06, 0.81)                                | -                               |

144 The model was adjusted for the maternal age, prepregnancy BMI, annual household income,  
 145 ethnicity, educational levels, smoking status, alcohol consumption, gravidity, seasons of enrollment,  
 146 and weeks of gestation. PM<sub>1</sub>, particulate matter with an aerodynamic diameter less than or equal to  
 147 1 μm; PM<sub>1-2.5</sub>, particulate matter with an aerodynamic diameter between 1 and 2.5 μm; and BMI,  
 148 body mass index. The 50<sup>th</sup> of PM<sub>1-2.5</sub> exposure is 13.26 μg/m<sup>3</sup>. The 50<sup>th</sup>, 75<sup>th</sup> and 95<sup>th</sup> percentile of  
 149 PM<sub>1</sub> exposure is 33.83 μg/m<sup>3</sup>, 38.55 μg/m<sup>3</sup> and 42.53 μg/m<sup>3</sup>.

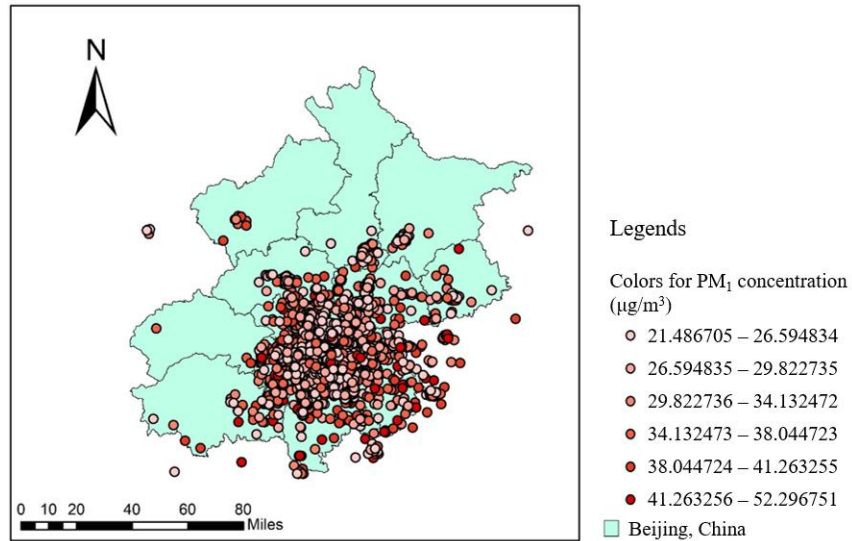

150

151 Figure S1. Location of study populations and PM<sub>1</sub> concentrations, 2018-2020.

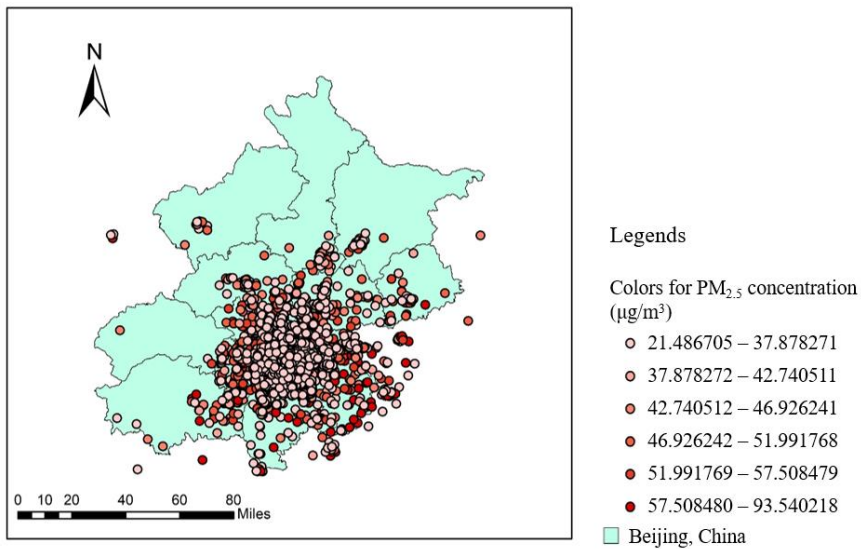

152

153 Figure S2. Location of study populations and PM<sub>2.5</sub> concentrations, 2018-2020.

154

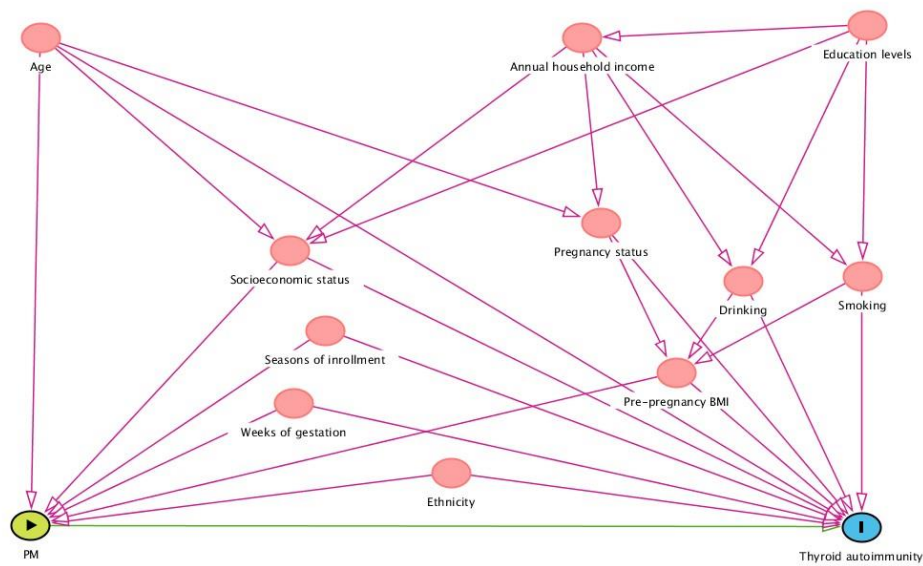

155  
156  
157

Figure S3. Directed acyclic graph (DAG) for the association between PM exposure and thyroid autoimmunity during pregnancy using DAGitty (<http://dagitty.net/>).

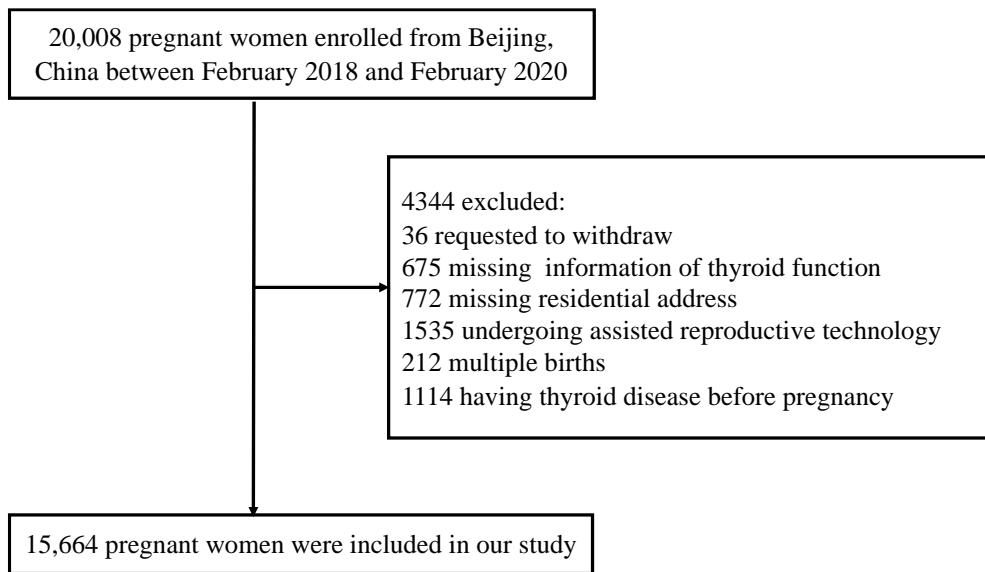

158  
159  
160

Figure S4. Flowchart of study enrolment, with the participants selected from Beijing Obstetrics and Gynecology Hospital during February 2018 and February 2020 (n = 15,664).

161  
162  
163  
164  
165  
166  
167  
168  
169  
170  
171  
172  
173  
174  
175  
176  
177  
178  
179  
180  
181  
182  
183  
184  
185  
186  
187  
188  
189  
190  
191  
192  
193  
194  
195  
196

## References

- (1) Janssen, B. G.; Saenen, N. D.; Roels, H. A.; Madhloum, N.; Gyselaers, W.; Lefebvre, W.; Penders, J.; Vanpoucke, C.; Vrijens, K.; Nawrot, T. S. Fetal Thyroid Function, Birth Weight, and in Utero Exposure to Fine Particle Air Pollution: A Birth Cohort Study. *Environ Health Perspect.* **2017**, *125* (4), 699-705; DOI: 10.1289/EHP508.
- (2) Zhao, Y.; Cao, Z.; Li, H.; Su, X.; Yang, Y.; Liu, C.; Hua, J. Air pollution exposure in association with maternal thyroid function during early pregnancy. *J Hazard Mater.* **2019**, *367*, 188-193; DOI: 10.1016/j.jhazmat.2018.12.078.
- (3) Ghassabian, A.; Pierotti, L.; Basterrechea, M.; Chatzi, L.; Estarlich, M.; Fernandez-Somoano, A.; Fleisch, A. F.; Gold, D. R.; Julvez, J.; Karakosta, P.; Lertxundi, A.; Lopez-Espinosa, M. J.; Mulder, T. A.; Korevaar, T. I. M.; Oken, E.; Peeters, R. P.; Rifas-Shiman, S.; Stephanou, E.; Tardon, A.; Tiemeier, H.; Vrijheid, M.; Vrijkotte, T. G. M.; Sunyer, J.; Guxens, M. Association of Exposure to Ambient Air Pollution With Thyroid Function During Pregnancy. *JAMA Netw Open.* **2019**, *2* (10), e1912902; DOI: 10.1001/jamanetworkopen.2019.12902.
- (4) Wang, X.; Liu, C.; Zhang, M.; Han, Y.; Aase, H.; Villanger, G. D.; Myhre, O.; Donkelaar, A. V.; Martin, R. V.; Baines, E. A.; Chen, R.; Kan, H.; Xia, Y. Evaluation of Maternal Exposure to PM(2.5) and Its Components on Maternal and Neonatal Thyroid Function and Birth Weight: A Cohort Study. *Thyroid.* **2019**, *29* (8), 1147-1157; DOI: 10.1089/thy.2018.0780.
- (5) Ilias, I.; Kakoulidis, I.; Togiatis, S.; Stergiotis, S.; Michou, A.; Lekkou, A.; Mastrodimou, V.; Pappa, A.; Venaki, E.; Koukkou, E. Atmospheric Pollution and Thyroid Function of Pregnant Women in Athens, Greece: A Pilot Study. *Med Sci (Basel).* **2020**, *8* (2); DOI: 10.3390/medsci8020019.
- (6) Li, J.; Liao, J.; Hu, C.; Bao, S.; Mahai, G.; Cao, Z.; Lin, C.; Xia, W.; Xu, S.; Li, Y. Preconceptional and the first trimester exposure to PM(2.5) and offspring neurodevelopment at 24 months of age: Examining mediation by maternal thyroid hormones in a birth cohort study. *Environ Pollut.* **2021**, *284*, 117133; DOI: 10.1016/j.envpol.2021.117133.
- (7) Zhang, X.; Huels, A.; Makuch, R.; Zhou, A.; Zheng, T.; Xia, W.; Gaskins, A.; Makuch, J.; Zhu, Z.; Zhu, C.; Qian, Z.; Xu, S.; Li, Y. Association of exposure to ambient particulate matter with maternal thyroid function in early pregnancy. *Environ Res.* **2022**, *214* (Pt 2), 113942; DOI: 10.1016/j.envres.2022.113942.
- (8) Qiu, L.; Shen, W.; Ye, C.; Wu, J.; Zheng, S.; Lou, B.; Chen, Z.; Xu, P.; Xu, D.; Wang, X.; Feng, B. Association of exposure to PM(2.5)-bound metals with maternal thyroid function in early pregnancy. *Sci Total Environ.* **2022**, *810*, 151167; DOI: 10.1016/j.scitotenv.2021.151167.
- (9) Zhou, Y.; Zhu, Q.; Wang, P.; Li, J.; Luo, R.; Zhao, W.; Zhang, L.; Shi, H.; Zhang, Y. Early pregnancy PM(2.5) exposure and its inorganic constituents affect fetal growth by interrupting maternal thyroid function. *Environ Pollut.* **2022**, *307*, 119481; DOI: 10.1016/j.envpol.2022.119481.
